# Supplementary material for: Single-Cell TCR Sequencing Reveals the Dynamics of T Cell Repertoire Profiling During Pneumocystis Infection
Source: Front Microbiol. 2021 Apr 20;12:637500. doi: 10.3389/fmicb.2021.637500 (PMC8093776; doi:10.3389/fmicb.2021.637500)
Supplement: Supplementary Table 6 — A list of common and unique V-J combinations in Figure 4E and V-D-J combinations in Figure 4G. [file Table_6.XLSX]

## Sheet: V-J combinations
0W	1W	2W	3W	4W	Count	V-J combinations
TRUE	TRUE	TRUE	TRUE	TRUE	89	TRBV13-1*TRBJ2-4	TRBV1*TRBJ2-3	TRBV13-2*TRBJ2-7	TRBV13-2*TRBJ1-2	TRBV13-2*TRBJ2-4	TRBV17*TRBJ2-7	TRBV29*TRBJ1-4	TRBV1*TRBJ2-2	TRBV13-1*TRBJ2-1	TRBV1*TRBJ2-5	TRBV12-2*TRBJ2-1	TRBV16*TRBJ2-1	TRBV26*TRBJ1-4	TRBV4*TRBJ2-5	TRBV31*TRBJ2-7	TRBV31*TRBJ2-5	TRBV29*TRBJ1-1	TRBV13-2*TRBJ2-5	TRBV3*TRBJ2-3	TRBV31*TRBJ2-1	TRBV13-3*TRBJ2-4	TRBV15*TRBJ1-1	TRBV20*TRBJ2-7	TRBV19*TRBJ2-5	TRBV15*TRBJ2-7	TRBV4*TRBJ1-2	TRBV19*TRBJ2-1	TRBV5*TRBJ2-5	TRBV14*TRBJ2-1	TRBV13-1*TRBJ1-1	TRBV15*TRBJ2-4	TRBV3*TRBJ2-1	TRBV3*TRBJ1-1	TRBV13-1*TRBJ2-3	TRBV13-2*TRBJ1-1	TRBV15*TRBJ1-4	TRBV3*TRBJ2-7	TRBV26*TRBJ1-1	TRBV19*TRBJ1-4	TRBV3*TRBJ2-5	TRBV20*TRBJ1-2	TRBV20*TRBJ2-1	TRBV15*TRBJ2-1	TRBV16*TRBJ2-7
FALSE	TRUE	TRUE	TRUE	TRUE	7	TRBV4*TRBJ2-4	TRBV30*TRBJ2-7	TRBV29*TRBJ2-5	TRBV13-3*TRBJ2-3	TRBV19*TRBJ1-6	TRBV20*TRBJ1-3	TRBV26*TRBJ1-6
TRUE	FALSE	TRUE	TRUE	TRUE	12	TRBV5*TRBJ2-3	TRBV20*TRBJ2-3	TRBV13-2*TRBJ2-2	TRBV12-1*TRBJ2-7	TRBV3*TRBJ1-5	TRBV13-3*TRBJ1-3	TRBV20*TRBJ1-4	TRBV31*TRBJ1-2	TRBV13-1*TRBJ1-2	TRBV29*TRBJ2-3	TRBV16*TRBJ1-2	TRBV15*TRBJ1-3
FALSE	FALSE	TRUE	TRUE	TRUE	2	TRBV4*TRBJ1-4	TRBV4*TRBJ2-2
TRUE	TRUE	FALSE	TRUE	TRUE	3	TRBV12-2*TRBJ1-3	TRBV5*TRBJ1-4	TRBV13-3*TRBJ1-2
FALSE	TRUE	FALSE	TRUE	TRUE	2	TRBV13-3*TRBJ2-2	TRBV17*TRBJ2-2
TRUE	FALSE	FALSE	TRUE	TRUE	0
FALSE	FALSE	FALSE	TRUE	TRUE	4	TRBV23*TRBJ2-5	TRBV12-1*TRBJ1-1	TRBV23*TRBJ2-1	TRBV14*TRBJ2-2
TRUE	TRUE	TRUE	FALSE	TRUE	29	TRBV2*TRBJ2-7	TRBV2*TRBJ2-1	TRBV15*TRBJ2-2	TRBV29*TRBJ2-4	TRBV19*TRBJ2-2	TRBV13-3*TRBJ1-1	TRBV13-2*TRBJ1-4	TRBV12-2*TRBJ1-1	TRBV5*TRBJ2-2	TRBV29*TRBJ2-7	TRBV12-1*TRBJ2-3	TRBV12-2*TRBJ2-5	TRBV16*TRBJ2-4	TRBV12-1*TRBJ2-5	TRBV12-1*TRBJ1-2	TRBV3*TRBJ1-3	TRBV29*TRBJ2-1	TRBV31*TRBJ2-2	TRBV2*TRBJ2-5	TRBV17*TRBJ2-1	TRBV12-1*TRBJ2-4	TRBV3*TRBJ2-4	TRBV17*TRBJ1-4	TRBV1*TRBJ2-1	TRBV20*TRBJ1-1	TRBV12-2*TRBJ2-4	TRBV12-1*TRBJ2-1	TRBV2*TRBJ1-1	TRBV12-2*TRBJ2-2
FALSE	TRUE	TRUE	FALSE	TRUE	4	TRBV20*TRBJ2-5	TRBV15*TRBJ2-5	TRBV31*TRBJ1-4	TRBV20*TRBJ2-2
TRUE	FALSE	TRUE	FALSE	TRUE	10	TRBV31*TRBJ1-5	TRBV1*TRBJ1-6	TRBV16*TRBJ1-3	TRBV13-1*TRBJ2-7	TRBV12-2*TRBJ1-5	TRBV26*TRBJ2-5	TRBV14*TRBJ1-1	TRBV2*TRBJ1-4	TRBV15*TRBJ2-3	TRBV14*TRBJ1-4
FALSE	FALSE	TRUE	FALSE	TRUE	3	TRBV29*TRBJ1-6	TRBV26*TRBJ2-2	TRBV2*TRBJ2-2
TRUE	TRUE	FALSE	FALSE	TRUE	6	TRBV12-2*TRBJ1-4	TRBV12-1*TRBJ1-4	TRBV12-1*TRBJ2-2	TRBV2*TRBJ2-3	TRBV20*TRBJ1-5	TRBV23*TRBJ2-7
FALSE	TRUE	FALSE	FALSE	TRUE	6	TRBV3*TRBJ1-6	TRBV13-1*TRBJ1-5	TRBV14*TRBJ2-3	TRBV4*TRBJ1-5	TRBV30*TRBJ1-2	TRBV2*TRBJ2-4
TRUE	FALSE	FALSE	FALSE	TRUE	4	TRBV12-2*TRBJ1-2	TRBV29*TRBJ1-5	TRBV12-2*TRBJ1-6	TRBV13-3*TRBJ1-5
FALSE	FALSE	FALSE	FALSE	TRUE	5	TRBV14*TRBJ1-6	TRBV23*TRBJ2-3	TRBV30*TRBJ1-3	TRBV23*TRBJ1-2	TRBV26*TRBJ1-5
TRUE	TRUE	TRUE	TRUE	FALSE	12	TRBV13-1*TRBJ1-3	TRBV19*TRBJ2-3	TRBV3*TRBJ1-4	TRBV13-2*TRBJ1-6	TRBV19*TRBJ1-2	TRBV14*TRBJ2-5	TRBV4*TRBJ2-3	TRBV26*TRBJ2-4	TRBV19*TRBJ1-5	TRBV5*TRBJ1-3	TRBV19*TRBJ2-4	TRBV17*TRBJ2-5
FALSE	TRUE	TRUE	TRUE	FALSE	1	TRBV12-2*TRBJ2-3
TRUE	FALSE	TRUE	TRUE	FALSE	1	TRBV15*TRBJ1-2
FALSE	FALSE	TRUE	TRUE	FALSE	0
TRUE	TRUE	FALSE	TRUE	FALSE	1	TRBV31*TRBJ1-3
FALSE	TRUE	FALSE	TRUE	FALSE	0
TRUE	FALSE	FALSE	TRUE	FALSE	5	TRBV1*TRBJ1-2	TRBV23*TRBJ1-1	TRBV31*TRBJ1-6	TRBV17*TRBJ1-5	TRBV14*TRBJ1-2
FALSE	FALSE	FALSE	TRUE	FALSE	1	TRBV17*TRBJ1-3
TRUE	TRUE	TRUE	FALSE	FALSE	7	TRBV20*TRBJ2-4	TRBV14*TRBJ1-3	TRBV14*TRBJ2-4	TRBV12-1*TRBJ1-6	TRBV2*TRBJ1-6	TRBV23*TRBJ1-4	TRBV17*TRBJ2-4
FALSE	TRUE	TRUE	FALSE	FALSE	3	TRBV30*TRBJ2-5	TRBV31*TRBJ2-4	TRBV12-1*TRBJ1-3
TRUE	FALSE	TRUE	FALSE	FALSE	8	TRBV23*TRBJ1-3	TRBV2*TRBJ1-3	TRBV29*TRBJ1-3	TRBV29*TRBJ2-2	TRBV16*TRBJ1-5	TRBV15*TRBJ1-5	TRBV17*TRBJ1-1	TRBV26*TRBJ1-2
FALSE	FALSE	TRUE	FALSE	FALSE	9	TRBV30*TRBJ1-1	TRBV17*TRBJ1-2	TRBV14*TRBJ1-5	TRBV26*TRBJ2-3	TRBV12-1*TRBJ1-5	TRBV15*TRBJ1-6	TRBV4*TRBJ1-3	TRBV4*TRBJ1-6	TRBV23*TRBJ1-6
TRUE	TRUE	FALSE	FALSE	FALSE	2	TRBV5*TRBJ1-2	TRBV2*TRBJ1-5
FALSE	TRUE	FALSE	FALSE	FALSE	5	TRBV2*TRBJ1-2	TRBV17*TRBJ2-3	TRBV23*TRBJ2-4	TRBV30*TRBJ2-4	TRBV20*TRBJ1-6
TRUE	FALSE	FALSE	FALSE	FALSE	4	TRBV30*TRBJ2-3	TRBV23*TRBJ1-5	TRBV23*TRBJ2-2	TRBV16*TRBJ1-6
[truncated: 45 more columns]

## Sheet: V-D-J combinations
0W	1W	2W	3W	4W	Count	V-D-J combinations
TRUE	TRUE	TRUE	TRUE	TRUE	53	TRBV3*TRBD1*TRBJ1-1	TRBV1*TRBD1*TRBJ2-2	TRBV3*TRBD1*TRBJ2-2	TRBV16*TRBD1*TRBJ2-7	TRBV13-1*TRBD2*TRBJ2-5	TRBV13-3*TRBD2*TRBJ2-7	TRBV13-2*TRBD1*TRBJ2-5	TRBV4*TRBD2*TRBJ2-7	TRBV12-2*TRBD1*TRBJ2-7	TRBV4*TRBD1*TRBJ1-1	TRBV26*TRBD1*TRBJ1-1	TRBV12-2*TRBD2*TRBJ2-7	TRBV1*TRBD1*TRBJ1-1	TRBV3*TRBD1*TRBJ1-2	TRBV3*TRBD2*TRBJ2-1	TRBV13-2*TRBD2*TRBJ2-7	TRBV16*TRBD1*TRBJ1-1	TRBV31*TRBD2*TRBJ2-3	TRBV3*TRBD2*TRBJ2-5	TRBV3*TRBD1*TRBJ2-7	TRBV3*TRBD2*TRBJ2-7	TRBV16*TRBD2*TRBJ2-5	TRBV13-2*TRBD1*TRBJ2-4	TRBV5*TRBD1*TRBJ1-1	TRBV13-2*TRBD1*TRBJ2-1	TRBV1*TRBD2*TRBJ2-7	TRBV26*TRBD1*TRBJ1-3	TRBV4*TRBD2*TRBJ2-1	TRBV13-1*TRBD1*TRBJ2-2	TRBV13-3*TRBD1*TRBJ2-7	TRBV15*TRBD1*TRBJ1-1	TRBV26*TRBD2*TRBJ2-7	TRBV13-1*TRBD1*TRBJ1-1	TRBV16*TRBD2*TRBJ2-7	TRBV19*TRBD1*TRBJ2-1	TRBV5*TRBD2*TRBJ2-5	TRBV13-1*TRBD1*TRBJ2-3	TRBV3*TRBD1*TRBJ2-1	TRBV5*TRBD2*TRBJ2-7	TRBV13-2*TRBD1*TRBJ1-1	TRBV15*TRBD2*TRBJ2-4	TRBV13-2*TRBD2*TRBJ2-3	TRBV13-3*TRBD2*TRBJ2-1	TRBV1*TRBD2*TRBJ2-5
FALSE	TRUE	TRUE	TRUE	TRUE	5	TRBV4*TRBD1*TRBJ1-2	TRBV13-3*TRBD2*TRBJ2-3	TRBV29*TRBD1*TRBJ2-5	TRBV13-3*TRBD1*TRBJ2-4	TRBV20*TRBD1*TRBJ1-2
TRUE	FALSE	TRUE	TRUE	TRUE	18	TRBV3*TRBD1*TRBJ1-5	TRBV13-2*TRBD2*TRBJ1-1	TRBV26*TRBD1*TRBJ2-7	TRBV14*TRBD2*TRBJ2-7	TRBV13-2*TRBD2*TRBJ2-5	TRBV16*TRBD1*TRBJ1-4	TRBV13-2*TRBD1*TRBJ2-2	TRBV1*TRBD2*TRBJ2-3	TRBV5*TRBD2*TRBJ2-3	TRBV19*TRBD1*TRBJ1-3	TRBV1*TRBD1*TRBJ2-5	TRBV15*TRBD1*TRBJ2-7	TRBV16*TRBD1*TRBJ2-1	TRBV3*TRBD2*TRBJ2-3	TRBV1*TRBD2*TRBJ2-4	TRBV4*TRBD1*TRBJ2-5	TRBV20*TRBD2*TRBJ2-3	TRBV13-1*TRBD1*TRBJ1-2
FALSE	FALSE	TRUE	TRUE	TRUE	4	TRBV13-2*TRBD1*TRBJ2-3	TRBV13-2*TRBD1*TRBJ1-3	TRBV4*TRBD1*TRBJ1-4	TRBV26*TRBD2*TRBJ2-1
TRUE	TRUE	FALSE	TRUE	TRUE	11	TRBV14*TRBD2*TRBJ2-1	TRBV13-2*TRBD1*TRBJ1-2	TRBV5*TRBD1*TRBJ1-4	TRBV13-3*TRBD1*TRBJ1-2	TRBV12-2*TRBD1*TRBJ1-3	TRBV13-3*TRBD1*TRBJ1-6	TRBV16*TRBD1*TRBJ2-2	TRBV12-2*TRBD2*TRBJ2-1	TRBV5*TRBD1*TRBJ2-5	TRBV1*TRBD1*TRBJ2-3	TRBV5*TRBD1*TRBJ1-6
FALSE	TRUE	FALSE	TRUE	TRUE	1	TRBV26*TRBD1*TRBJ1-6
TRUE	FALSE	FALSE	TRUE	TRUE	4	TRBV13-1*TRBD2*TRBJ2-3	TRBV31*TRBD1*TRBJ1-2	TRBV12-1*TRBD2*TRBJ2-7	TRBV5*TRBD1*TRBJ2-3
FALSE	FALSE	FALSE	TRUE	TRUE	3	TRBV23*TRBD2*TRBJ2-5	TRBV31*TRBD1*TRBJ2-5	TRBV12-1*TRBD1*TRBJ1-1
TRUE	TRUE	TRUE	FALSE	TRUE	38	TRBV15*TRBD2*TRBJ2-7	TRBV13-1*TRBD1*TRBJ2-4	TRBV2*TRBD2*TRBJ2-5	TRBV1*TRBD1*TRBJ2-7	TRBV19*TRBD2*TRBJ2-1	TRBV17*TRBD1*TRBJ1-4	TRBV1*TRBD2*TRBJ2-1	TRBV13-3*TRBD1*TRBJ1-1	TRBV26*TRBD1*TRBJ1-4	TRBV16*TRBD2*TRBJ2-4	TRBV16*TRBD2*TRBJ2-1	TRBV29*TRBD1*TRBJ2-7	TRBV5*TRBD1*TRBJ2-1	TRBV12-1*TRBD1*TRBJ1-2	TRBV31*TRBD1*TRBJ2-2	TRBV19*TRBD1*TRBJ2-2	TRBV17*TRBD2*TRBJ2-7	TRBV19*TRBD1*TRBJ2-5	TRBV3*TRBD1*TRBJ2-4	TRBV5*TRBD1*TRBJ2-4	TRBV13-2*TRBD1*TRBJ2-7	TRBV20*TRBD2*TRBJ2-1	TRBV4*TRBD2*TRBJ2-5	TRBV1*TRBD1*TRBJ2-1	TRBV29*TRBD1*TRBJ2-1	TRBV20*TRBD1*TRBJ1-1	TRBV31*TRBD2*TRBJ2-7	TRBV31*TRBD2*TRBJ2-5	TRBV3*TRBD1*TRBJ2-3	TRBV13-2*TRBD2*TRBJ2-1	TRBV13-1*TRBD1*TRBJ2-5	TRBV20*TRBD1*TRBJ2-7	TRBV13-1*TRBD2*TRBJ2-1	TRBV31*TRBD2*TRBJ2-1	TRBV19*TRBD2*TRBJ2-7	TRBV26*TRBD1*TRBJ2-1	TRBV13-2*TRBD1*TRBJ1-4	TRBV15*TRBD2*TRBJ2-2
FALSE	TRUE	TRUE	FALSE	TRUE	10	TRBV13-1*TRBD2*TRBJ2-2	TRBV12-1*TRBD1*TRBJ2-1	TRBV13-3*TRBD2*TRBJ2-5	TRBV12-2*TRBD1*TRBJ2-1	TRBV3*TRBD1*TRBJ1-3	TRBV5*TRBD2*TRBJ2-4	TRBV31*TRBD1*TRBJ1-1	TRBV12-2*TRBD1*TRBJ2-5	TRBV1*TRBD1*TRBJ1-4	TRBV15*TRBD1*TRBJ2-5
TRUE	FALSE	TRUE	FALSE	TRUE	23	TRBV14*TRBD1*TRBJ1-1	TRBV13-2*TRBD2*TRBJ2-2	TRBV12-2*TRBD1*TRBJ1-1	TRBV16*TRBD1*TRBJ1-2	TRBV31*TRBD1*TRBJ1-5	TRBV29*TRBD1*TRBJ1-4	TRBV13-1*TRBD1*TRBJ1-4	TRBV1*TRBD1*TRBJ1-6	TRBV2*TRBD2*TRBJ2-7	TRBV20*TRBD1*TRBJ1-4	TRBV13-1*TRBD1*TRBJ2-7	TRBV29*TRBD2*TRBJ2-7	TRBV19*TRBD2*TRBJ2-5	TRBV12-1*TRBD2*TRBJ2-3	TRBV13-1*TRBD2*TRBJ2-7	TRBV19*TRBD1*TRBJ1-4	TRBV12-2*TRBD2*TRBJ2-2	TRBV26*TRBD1*TRBJ2-5	TRBV12-1*TRBD1*TRBJ2-7	TRBV12-1*TRBD2*TRBJ2-1	TRBV16*TRBD2*TRBJ2-3	TRBV3*TRBD1*TRBJ2-5	TRBV14*TRBD1*TRBJ1-4
FALSE	FALSE	TRUE	FALSE	TRUE	16	TRBV5*TRBD1*TRBJ2-2	TRBV4*TRBD1*TRBJ2-7	TRBV29*TRBD1*TRBJ1-6	TRBV20*TRBD2*TRBJ2-5	TRBV20*TRBD1*TRBJ2-3	TRBV5*TRBD2*TRBJ1-6	TRBV2*TRBD1*TRBJ1-4	TRBV15*TRBD2*TRBJ2-5	TRBV4*TRBD1*TRBJ2-2	TRBV2*TRBD1*TRBJ2-7	TRBV29*TRBD2*TRBJ2-4	TRBV2*TRBD2*TRBJ2-1	TRBV4*TRBD2*TRBJ2-4	TRBV16*TRBD1*TRBJ1-3	TRBV1*TRBD2*TRBJ2-2	TRBV13-3*TRBD2*TRBJ1-6
TRUE	TRUE	FALSE	FALSE	TRUE	9	TRBV2*TRBD1*TRBJ2-1	TRBV12-1*TRBD2*TRBJ2-5	TRBV12-2*TRBD2*TRBJ2-5	TRBV16*TRBD1*TRBJ2-5	TRBV12-2*TRBD1*TRBJ1-4	TRBV20*TRBD1*TRBJ1-5	TRBV1*TRBD1*TRBJ2-4	TRBV15*TRBD2*TRBJ1-1	TRBV12-1*TRBD1*TRBJ1-4
FALSE	TRUE	FALSE	FALSE	TRUE	10	TRBV13-3*TRBD1*TRBJ2-2	TRBV17*TRBD1*TRBJ2-2	TRBV13-1*TRBD1*TRBJ1-5	TRBV3*TRBD1*TRBJ1-6	TRBV4*TRBD1*TRBJ1-5	TRBV20*TRBD1*TRBJ1-3	TRBV23*TRBD2*TRBJ2-7	TRBV20*TRBD1*TRBJ2-5	TRBV2*TRBD2*TRBJ2-4	TRBV2*TRBD1*TRBJ2-3
TRUE	FALSE	FALSE	FALSE	TRUE	10	TRBV13-3*TRBD1*TRBJ1-4	TRBV15*TRBD2*TRBJ2-3	TRBV3*TRBD2*TRBJ2-4	TRBV29*TRBD2*TRBJ2-3	TRBV12-1*TRBD1*TRBJ2-3	TRBV2*TRBD2*TRBJ2-3	TRBV26*TRBD2*TRBJ2-5	TRBV12-2*TRBD1*TRBJ1-2	TRBV12-2*TRBD2*TRBJ1-1	TRBV13-3*TRBD1*TRBJ1-5
FALSE	FALSE	FALSE	FALSE	TRUE	17	TRBV14*TRBD1*TRBJ2-2	TRBV12-1*TRBD2*TRBJ1-1	TRBV13-3*TRBD2*TRBJ1-5	TRBV29*TRBD1*TRBJ1-5	TRBV23*TRBD1*TRBJ2-3	TRBV20*TRBD1*TRBJ2-2	TRBV30*TRBD2*TRBJ1-2	TRBV19*TRBD2*TRBJ1-6	TRBV2*TRBD2*TRBJ2-2	TRBV14*TRBD1*TRBJ1-6	TRBV19*TRBD2*TRBJ1-1	TRBV23*TRBD1*TRBJ2-1	TRBV13-3*TRBD2*TRBJ1-3	TRBV12-2*TRBD1*TRBJ1-6	TRBV14*TRBD1*TRBJ2-3	TRBV12-2*TRBD2*TRBJ1-5	TRBV31*TRBD1*TRBJ1-4
TRUE	TRUE	TRUE	TRUE	FALSE	9	TRBV20*TRBD2*TRBJ2-7	TRBV13-3*TRBD2*TRBJ2-4	TRBV26*TRBD2*TRBJ2-4	TRBV29*TRBD1*TRBJ1-1	TRBV5*TRBD1*TRBJ2-7	TRBV15*TRBD2*TRBJ2-1	TRBV3*TRBD1*TRBJ1-4	TRBV14*TRBD2*TRBJ2-5	TRBV14*TRBD1*TRBJ2-7
FALSE	TRUE	TRUE	TRUE	FALSE	6	TRBV4*TRBD1*TRBJ2-4	TRBV4*TRBD1*TRBJ2-1	TRBV19*TRBD1*TRBJ1-6	TRBV5*TRBD1*TRBJ1-5	TRBV30*TRBD2*TRBJ2-7	TRBV13-2*TRBD1*TRBJ1-6
TRUE	FALSE	TRUE	TRUE	FALSE	9	TRBV19*TRBD1*TRBJ1-2	TRBV15*TRBD1*TRBJ1-3	TRBV31*TRBD1*TRBJ2-3	TRBV19*TRBD1*TRBJ2-4	TRBV1*TRBD1*TRBJ1-5	TRBV13-3*TRBD1*TRBJ1-3	TRBV13-3*TRBD1*TRBJ2-1	TRBV16*TRBD1*TRBJ2-3	TRBV5*TRBD1*TRBJ1-3
FALSE	FALSE	TRUE	TRUE	FALSE	4	TRBV12-2*TRBD2*TRBJ2-3	TRBV29*TRBD1*TRBJ2-3	TRBV4*TRBD2*TRBJ2-3	TRBV16*TRBD2*TRBJ1-1
TRUE	TRUE	FALSE	TRUE	FALSE	3	TRBV31*TRBD1*TRBJ1-3	TRBV19*TRBD1*TRBJ1-5	TRBV20*TRBD1*TRBJ2-1
FALSE	TRUE	FALSE	TRUE	FALSE	2	TRBV17*TRBD1*TRBJ2-5	TRBV29*TRBD2*TRBJ2-5
TRUE	FALSE	FALSE	TRUE	FALSE	5	TRBV1*TRBD1*TRBJ1-2	TRBV23*TRBD1*TRBJ1-1	TRBV13-2*TRBD2*TRBJ1-6	TRBV31*TRBD1*TRBJ2-1	TRBV26*TRBD1*TRBJ2-4
FALSE	FALSE	FALSE	TRUE	FALSE	8	TRBV17*TRBD1*TRBJ1-5	TRBV20*TRBD2*TRBJ1-4	TRBV13-3*TRBD2*TRBJ1-4	TRBV15*TRBD2*TRBJ1-2	TRBV13-1*TRBD2*TRBJ1-4	TRBV26*TRBD2*TRBJ1-4	TRBV4*TRBD2*TRBJ1-1	TRBV17*TRBD1*TRBJ1-3
TRUE	TRUE	TRUE	FALSE	FALSE	13	TRBV5*TRBD2*TRBJ2-2	TRBV19*TRBD1*TRBJ2-3	TRBV3*TRBD2*TRBJ2-2	TRBV14*TRBD1*TRBJ2-1	TRBV19*TRBD2*TRBJ2-4	TRBV17*TRBD2*TRBJ2-1	TRBV19*TRBD2*TRBJ2-3	TRBV15*TRBD1*TRBJ2-2	TRBV17*TRBD2*TRBJ2-5	TRBV12-2*TRBD2*TRBJ2-4	TRBV12-1*TRBD2*TRBJ2-4	TRBV2*TRBD1*TRBJ1-1	TRBV29*TRBD1*TRBJ1-2
FALSE	TRUE	TRUE	FALSE	FALSE	6	TRBV30*TRBD1*TRBJ2-5	TRBV20*TRBD1*TRBJ2-4	TRBV12-2*TRBD1*TRBJ2-2	TRBV12-2*TRBD1*TRBJ2-4	TRBV13-2*TRBD2*TRBJ1-4	TRBV31*TRBD1*TRBJ2-4
TRUE	FALSE	TRUE	FALSE	FALSE	18	TRBV29*TRBD1*TRBJ2-2	TRBV15*TRBD1*TRBJ2-3	TRBV20*TRBD2*TRBJ2-4	TRBV17*TRBD1*TRBJ1-1	TRBV1*TRBD2*TRBJ1-1	TRBV12-1*TRBD1*TRBJ1-6	TRBV13-1*TRBD2*TRBJ2-4	TRBV12-1*TRBD1*TRBJ2-4	TRBV5*TRBD2*TRBJ1-1	TRBV12-2*TRBD1*TRBJ1-5	TRBV29*TRBD1*TRBJ1-3	TRBV16*TRBD1*TRBJ2-4	TRBV12-1*TRBD1*TRBJ2-5	TRBV15*TRBD1*TRBJ1-2	TRBV15*TRBD1*TRBJ1-5	TRBV1*TRBD1*TRBJ1-3	TRBV16*TRBD1*TRBJ1-5	TRBV26*TRBD1*TRBJ1-2
FALSE	FALSE	TRUE	FALSE	FALSE	28	TRBV4*TRBD2*TRBJ1-3	TRBV26*TRBD1*TRBJ2-3	TRBV31*TRBD2*TRBJ1-4	TRBV29*TRBD2*TRBJ2-2	TRBV17*TRBD1*TRBJ2-4	TRBV2*TRBD1*TRBJ1-6	TRBV12-1*TRBD2*TRBJ1-3	TRBV5*TRBD2*TRBJ1-5	TRBV26*TRBD2*TRBJ1-6	TRBV2*TRBD1*TRBJ1-3	TRBV14*TRBD1*TRBJ2-5	TRBV13-3*TRBD1*TRBJ2-3	TRBV14*TRBD1*TRBJ1-5	TRBV26*TRBD1*TRBJ2-2	TRBV23*TRBD1*TRBJ1-4	TRBV14*TRBD2*TRBJ2-4	TRBV15*TRBD1*TRBJ1-6	TRBV14*TRBD2*TRBJ1-1	TRBV13-1*TRBD1*TRBJ1-3	TRBV4*TRBD2*TRBJ1-2	TRBV20*TRBD2*TRBJ1-3	TRBV20*TRBD2*TRBJ2-2	TRBV26*TRBD2*TRBJ2-2	TRBV17*TRBD1*TRBJ1-2	TRBV14*TRBD2*TRBJ1-4	TRBV23*TRBD1*TRBJ1-6	TRBV3*TRBD2*TRBJ1-2	TRBV3*TRBD2*TRBJ1-3
TRUE	TRUE	FALSE	FALSE	FALSE	11	TRBV5*TRBD1*TRBJ1-2	TRBV16*TRBD2*TRBJ2-2	TRBV13-1*TRBD1*TRBJ2-1	TRBV17*TRBD1*TRBJ2-7	TRBV14*TRBD1*TRBJ2-4	TRBV17*TRBD2*TRBJ2-4	TRBV23*TRBD1*TRBJ2-7	TRBV29*TRBD1*TRBJ2-4	TRBV15*TRBD1*TRBJ2-1	TRBV19*TRBD2*TRBJ2-2	TRBV2*TRBD1*TRBJ1-5
FALSE	TRUE	FALSE	FALSE	FALSE	15	TRBV2*TRBD1*TRBJ1-2	TRBV30*TRBD1*TRBJ1-2	TRBV19*TRBD2*TRBJ1-4	TRBV12-1*TRBD1*TRBJ1-3	TRBV1*TRBD2*TRBJ1-4	TRBV13-3*TRBD2*TRBJ1-1	TRBV1*TRBD2*TRBJ1-3	TRBV17*TRBD1*TRBJ2-3	TRBV2*TRBD1*TRBJ2-4	TRBV12-1*TRBD2*TRBJ1-2	TRBV14*TRBD2*TRBJ2-3	TRBV13-1*TRBD2*TRBJ1-3	TRBV30*TRBD1*TRBJ2-4	TRBV23*TRBD1*TRBJ2-4	TRBV1*TRBD2*TRBJ1-5
TRUE	FALSE	FALSE	FALSE	FALSE	16	TRBV2*TRBD2*TRBJ1-1	TRBV2*TRBD2*TRBJ1-4	TRBV2*TRBD1*TRBJ2-5	TRBV14*TRBD1*TRBJ1-2	TRBV31*TRBD2*TRBJ1-1	TRBV31*TRBD1*TRBJ1-6	TRBV12-2*TRBD2*TRBJ1-6	TRBV29*TRBD2*TRBJ1-1	TRBV13-2*TRBD2*TRBJ1-5	TRBV12-1*TRBD2*TRBJ2-2	TRBV16*TRBD2*TRBJ1-3	TRBV4*TRBD1*TRBJ2-3	TRBV23*TRBD1*TRBJ1-5	TRBV23*TRBD1*TRBJ1-3	TRBV23*TRBD2*TRBJ2-2	TRBV15*TRBD2*TRBJ1-4
[truncated: 9 more columns]
